# Supplementary material for: Comparative omics analysis of a deep-sea barnacle species (Cirripedia, Scalpellomorpha) and shallow-water barnacle species provides insights into deep-sea adaptation
Source: Frontiers journal article supplement (doi:10.3389/fmars.2023.1269411), 2024-01-12
Supplement: Table_1.DOCX [file Table_1.DOCX]

**Table S1** Nucleotide composition and gene skew of the *Vulcanolepas fijiensis* mitogenomes

| Gene | Nucleotide composition | | | | A+T (%) | AT skew | GC skew |
| --- | --- | --- | --- | --- | --- | --- | --- |
| A (%) | C (%) | G (%) | T (%) |
| *ATP6* | 32.3 | 22.1 | 9.3 | 36.3 | 68.6 | -0.058 | -0.408 |
| *ATP8* | 36.5 | 20.8 | 5.7 | 37.1 | 73.6 | -0.008 | -0.570 |
| *COB* | 31.3 | 23.7 | 12.1 | 32.9 | 64.2 | -0.025 | -0.324 |
| *COI* | 29.9 | 20.3 | 15.8 | 34.1 | 64.0 | -0.066 | -0.125 |
| *COII* | 31.9 | 21.3 | 12.6 | 34.2 | 66.1 | -0.035 | -0.257 |
| *COIII* | 27.8 | 24.1 | 13.6 | 34.6 | 62.4 | -0.109 | -0.279 |
| *ND1* | 20.9 | 10.4 | 21.5 | 47.2 | 68.1 | -0.386 | 0.348 |
| *ND2* | 32.7 | 20.5 | 9.3 | 37.5 | 70.2 | -0.068 | -0.376 |
| *ND3* | 30.2 | 20.1 | 13.5 | 36.2 | 66.4 | -0.090 | -0.196 |
| *ND4* | 22.2 | 8.9 | 20.7 | 48.2 | 70.4 | -0.369 | 0.399 |
| *ND4L* | 22.8 | 5.3 | 24.2 | 47.7 | 70.5 | -0.353 | 0.641 |
| *ND5* | 22.9 | 7.7 | 21.9 | 47.5 | 70.4 | -0.349 | 0.480 |
| *ND6* | 36.0 | 21.1 | 5.1 | 37.8 | 73.8 | -0.024 | -0.611 |
| *srRNA* | 31.5 | 10.5 | 21.1 | 36.9 | 68.4 | -0.079 | 0.335 |
| *lrRNA* | 39.8 | 18.4 | 7.6 | 34.2 | 74.0 | 0.076 | -0.415 |
| All PCGs | 40.8 | 15.8 | 17.1 | 26.3 | 67.1 | 0.216 | 0.040 |
