# Supplementary material for: Comparative omics analysis of a deep-sea barnacle species (Cirripedia, Scalpellomorpha) and shallow-water barnacle species provides insights into deep-sea adaptation
Source: Frontiers journal article supplement (doi:10.3389/fmars.2023.1269411), 2024-01-12
Supplement: Table_2.DOCX [file Table_2.DOCX]

**Table S2** Nucleotide composition and gene skew of the *Scalpellum stearnsi* mitogenomes

| Gene | Nucleotide composition | | | | A+T (%) | AT skew | GC skew |
| --- | --- | --- | --- | --- | --- | --- | --- |
| A (%) | C (%) | G (%) | T (%) |
| *ATP6* | 33.2 | 18.3 | 9.3 | 39.2 | 72.4 | -0.083 | -0.326 |
| *ATP8* | 40.3 | 20.1 | 3.1 | 36.5 | 76.8 | 0.049 | -0.733 |
| *COB* | 31.3 | 20.0 | 12.8 | 35.9 | 67.2 | -0.068 | -0.220 |
| *COI* | 29.7 | 19.1 | 16.0 | 35.2 | 64.9 | -0.085 | -0.088 |
| *COII* | 31.9 | 20.6 | 13.0 | 34.5 | 66.4 | -0.039 | -0.226 |
| *COIII* | 30.2 | 21.1 | 13.1 | 35.7 | 65.9 | -0.083 | -0.234 |
| *ND1* | 24.3 | 8.6 | 20.0 | 47.1 | 71.4 | -0.319 | 0.399 |
| *ND2* | 35.2 | 16.1 | 8.9 | 39.8 | 75.0 | -0.061 | -0.288 |
| *ND3* | 34.7 | 19.5 | 11.9 | 33.9 | 68.6 | 0.012 | -0.242 |
| *ND4* | 22.8 | 9.3 | 19.5 | 48.3 | 71.1 | -0.359 | 0.354 |
| *ND4L* | 23.4 | 9.6 | 19.5 | 47.5 | 70.9 | -0.340 | 0.340 |
| *ND5* | 25.0 | 9.7 | 19.1 | 46.2 | 71.2 | -0.298 | 0.326 |
| *ND6* | 37.9 | 15.9 | 7.7 | 38.5 | 76.4 | -0.008 | -0.347 |
| *srRNA* | 33.6 | 8.8 | 17.5 | 40.0 | 73.6 | -0.087 | 0.331 |
| *lrRNA* | 34.5 | 8.1 | 16.4 | 41.0 | 75.5 | -0.086 | 0.339 |
| All PCGs | 29.2 | 15.2 | 14.9 | 40.6 | 69.8 | -0.163 | -0.010 |
