# Supplementary material for: Comparative omics analysis of a deep-sea barnacle species (Cirripedia, Scalpellomorpha) and shallow-water barnacle species provides insights into deep-sea adaptation
Source: Frontiers journal article supplement (doi:10.3389/fmars.2023.1269411), 2024-01-12
Supplement: Table_3.DOCX [file Table_3.DOCX]

**Table S3** Orthologs between *Vulcanolepas fijiensis* and *Scalpellum stearnsi*

| Orthologs | Internal reference | *Scalpellum stearnsi* | *Vulcanolepas fijiensis* | External reference |
| --- | --- | --- | --- | --- |
| OG08533 | ama|XP_043188736.1 | CHN|c96364_g2 | DHV|c29218_g1 | eua|XP_023336110.1 |
| OG08534 | ama|XP_043189130.1 | CHN|c96460_g1 | DHV|c20052_g1 | eua|XP_023341970.1 |
| OG08535 | ama|XP_043190029.1 | CHN|c95355_g3 | DHV|c25431_g1 | eua|XP_023326939.1 |
| OG08536 | ama|XP_043190040.1 | CHN|c80935_g2 | DHV|c21723_g1 | eua|XP_023345535.1 |
| OG08537 | ama|XP_043190041.1 | CHN|c90100_g1 | DHV|c11937_g1 | eua|XP_023321811.1 |
| OG08538 | ama|XP_043190042.1 | CHN|c97216_g4 | DHV|c23679_g1 | eua|XP_023333620.1 |
| OG08539 | ama|XP_043190501.1 | CHN|c87577_g1 | DHV|c34430_g1 | eua|XP_023333294.1 |
| OG08540 | ama|XP_043190741.1 | CHN|c92616_g1 | DHV|c22465_g1 | eua|XP_023334142.1 |
| OG08541 | ama|XP_043191305.1 | CHN|c90062_g1 | DHV|c24997_g1 | eua|XP_023325125.1 |
| OG08543 | ama|XP_043192991.1 | CHN|c83849_g1 | DHV|c23977_g1 | eua|XP_023344927.1 |
| OG08545 | ama|XP_043193373.1 | CHN|c94664_g1 | DHV|c19922_g1 | eua|XP_023332132.1 |
| OG08546 | ama|XP_043195538.1 | CHN|c88012_g2 | DHV|c41464_g1 | eua|XP_023325450.1 |
| OG08547 | ama|XP_043195581.1 | CHN|c20252_g1 | DHV|c20876_g1 | eua|XP_023338857.1 |
| OG08548 | ama|XP_043195714.1 | CHN|c84339_g1 | DHV|c26003_g2 | eua|XP_023345017.1 |
| OG08550 | ama|XP_043196590.1 | CHN|c80376_g2 | DHV|c34382_g1 | eua|XP_023343105.1 |
| OG08552 | ama|XP_043197260.1 | CHN|c34294_g1 | DHV|c51428_g1 | eua|XP_023328160.1 |
| OG08554 | ama|XP_043197657.1 | CHN|c90039_g2 | DHV|c33487_g8 | eua|XP_023332099.1 |
| OG08555 | ama|XP_043197875.1 | CHN|c15013_g1 | DHV|c45171_g1 | eua|XP_023322892.1 |
| OG08556 | ama|XP_043198184.1 | CHN|c61493_g1 | DHV|c33599_g7 | eua|XP_023326597.1 |
| OG08557 | ama|XP_043198430.1 | CHN|c93637_g2 | DHV|c32667_g1 | eua|XP_023349407.1 |
| OG08558 | ama|XP_043198832.1 | CHN|c110623_g1 | DHV|c34158_g2 | eua|XP_023329844.1 |
| OG08561 | ama|XP_043199394.1 | CHN|c60459_g1 | DHV|c15568_g1 | eua|XP_023349089.1 |
| OG08563 | ama|XP_043201627.1 | CHN|c74151_g1 | DHV|c38402_g1 | eua|XP_023335326.1 |
| OG08564 | ama|XP_043201940.1 | CHN|c92282_g1 | DHV|c33395_g4 | eua|XP_023330952.1 |
| OG08565 | ama|XP_043203118.1 | CHN|c96311_g2 | DHV|c33082_g1 | eua|XP_023338539.1 |
| OG08566 | ama|XP_043203368.1 | CHN|c80322_g1 | DHV|c33612_g2 | eua|XP_023337395.1 |
| OG08568 | ama|XP_043205710.1 | CHN|c67730_g1 | DHV|c25157_g1 | eua|XP_023343484.1 |
| OG08569 | ama|XP_043206528.1 | CHN|c72449_g1 | DHV|c20487_g1 | eua|XP_023337543.1 |
| OG08570 | ama|XP_043207086.1 | CHN|c82155_g1 | DHV|c34067_g1 | eua|XP_023325113.1 |
| OG08571 | ama|XP_043208298.1 | CHN|c93239_g2 | DHV|c19526_g1 | eua|XP_023333425.1 |
| OG08572 | ama|XP_043208335.1 | CHN|c95071_g3 | DHV|c28032_g1 | eua|XP_023337265.1 |
| OG08573 | ama|XP_043208458.1 | CHN|c35602_g1 | DHV|c6673_g1 | eua|XP_023336745.1 |
| OG08574 | ama|XP_043208970.1 | CHN|c97368_g1 | DHV|c16066_g2 | eua|XP_023320878.1 |
| OG08576 | ama|XP_043209217.1 | CHN|c94960_g1 | DHV|c20128_g1 | eua|XP_023342637.1 |
| OG08577 | ama|XP_043209948.1 | CHN|c87819_g1 | DHV|c31298_g1 | eua|XP_023347507.1 |
| OG08578 | ama|XP_043210099.1 | CHN|c31223_g1 | DHV|c33115_g1 | eua|XP_023346370.1 |
| OG08579 | ama|XP_043210748.1 | CHN|c123273_g1 | DHV|c26873_g1 | eua|XP_023334027.1 |
| OG08580 | ama|XP_043211351.1 | CHN|c95029_g1 | DHV|c30131_g1 | eua|XP_023335600.1 |
| OG08581 | ama|XP_043211937.1 | CHN|c95272_g2 | DHV|c27761_g1 | eua|XP_023339667.1 |
| OG08582 | ama|XP_043211994.1 | CHN|c91713_g1 | DHV|c27421_g1 | eua|XP_023322538.1 |
| OG08584 | ama|XP_043212294.1 | CHN|c93830_g1 | DHV|c31193_g1 | eua|XP_023322871.1 |
| OG08586 | ama|XP_043212383.1 | CHN|c84615_g2 | DHV|c13142_g1 | eua|XP_023341713.1 |
| OG08587 | ama|XP_043212474.1 | CHN|c89418_g1 | DHV|c7975_g1 | eua|XP_023348443.1 |
| OG08588 | ama|XP_043212802.1 | CHN|c72113_g2 | DHV|c33142_g1 | eua|XP_023328029.1 |
| OG08589 | ama|XP_043212820.1 | CHN|c77119_g1 | DHV|c32290_g1 | eua|XP_023319677.1 |
| OG08590 | ama|XP_043213063.1 | CHN|c58184_g1 | DHV|c34432_g3 | eua|XP_023344892.1 |
| OG08591 | ama|XP_043213481.1 | CHN|c16302_g1 | DHV|c12865_g1 | eua|XP_023326521.1 |
| OG08592 | ama|XP_043214016.1 | CHN|c94564_g1 | DHV|c27300_g1 | eua|XP_023321187.1 |
| OG08593 | ama|XP_043214047.1 | CHN|c86689_g1 | DHV|c23153_g1 | eua|XP_023345717.1 |
| OG08594 | ama|XP_043214190.1 | CHN|c87907_g2 | DHV|c43510_g1 | eua|XP_023335196.1 |
| OG08595 | ama|XP_043214526.1 | CHN|c88290_g1 | DHV|c23678_g1 | eua|XP_023346824.1 |
| OG08596 | ama|XP_043214547.1 | CHN|c90266_g1 | DHV|c41484_g1 | eua|XP_023336675.1 |
| OG08597 | ama|XP_043214654.1 | CHN|c91195_g3 | DHV|c20170_g1 | eua|XP_023323881.1 |
| OG08598 | ama|XP_043215038.1 | CHN|c94969_g2 | DHV|c16137_g1 | eua|XP_023323173.1 |
| OG08600 | ama|XP_043215315.1 | CHN|c79716_g1 | DHV|c32346_g1 | eua|XP_023325028.1 |
| OG08601 | ama|XP_043215402.1 | CHN|c78540_g1 | DHV|c35207_g1 | eua|XP_023336664.1 |
| OG08602 | ama|XP_043215616.1 | CHN|c95108_g1 | DHV|c34553_g3 | eua|XP_023342022.1 |
| OG08603 | ama|XP_043216056.1 | CHN|c96287_g1 | DHV|c16372_g1 | eua|XP_023327407.1 |
| OG08604 | ama|XP_043216069.1 | CHN|c22851_g1 | DHV|c53001_g1 | eua|XP_023331897.1 |
| OG08605 | ama|XP_043216297.1 | CHN|c85254_g1 | DHV|c15977_g1 | eua|XP_023338457.1 |
| OG08606 | ama|XP_043216300.1 | CHN|c68961_g1 | DHV|c32266_g2 | eua|XP_023342837.1 |
| OG08607 | ama|XP_043216428.1 | CHN|c78351_g1 | DHV|c29932_g1 | eua|XP_023324620.1 |
| OG08608 | ama|XP_043216509.1 | CHN|c92733_g1 | DHV|c12440_g1 | eua|XP_023330493.1 |
| OG08609 | ama|XP_043216744.1 | CHN|c106411_g1 | DHV|c23926_g1 | eua|XP_023328013.1 |
| OG08610 | ama|XP_043216888.1 | CHN|c93887_g2 | DHV|c47556_g1 | eua|XP_023343147.1 |
| OG08611 | ama|XP_043216967.1 | CHN|c75989_g1 | DHV|c32970_g1 | eua|XP_023334334.1 |
| OG08612 | ama|XP_043217390.1 | CHN|c96639_g3 | DHV|c25574_g1 | eua|XP_023342200.1 |
| OG08613 | ama|XP_043218685.1 | CHN|c96002_g9 | DHV|c30329_g3 | eua|XP_023340519.1 |
| OG08614 | ama|XP_043218727.1 | CHN|c63288_g1 | DHV|c45528_g1 | eua|XP_023328570.1 |
| OG08615 | ama|XP_043218984.1 | CHN|c109779_g1 | DHV|c34093_g1 | eua|XP_023320401.1 |
| OG08616 | ama|XP_043219096.1 | CHN|c86497_g1 | DHV|c41292_g1 | eua|XP_023342945.1 |
| OG08617 | ama|XP_043219101.1 | CHN|c84182_g1 | DHV|c23880_g1 | eua|XP_023346327.1 |
| OG08618 | ama|XP_043219141.1 | CHN|c95226_g2 | DHV|c30014_g3 | eua|XP_023335758.1 |
| OG08619 | ama|XP_043219748.1 | CHN|c76309_g1 | DHV|c8046_g1 | eua|XP_023332066.1 |
| OG08620 | ama|XP_043220152.1 | CHN|c64465_g1 | DHV|c21084_g1 | eua|XP_023327597.1 |
| OG08621 | ama|XP_043220571.1 | CHN|c90508_g1 | DHV|c25435_g1 | eua|XP_023343333.1 |
| OG08622 | ama|XP_043220589.1 | CHN|c87340_g1 | DHV|c20806_g1 | eua|XP_023330259.1 |
| OG08623 | ama|XP_043220608.1 | CHN|c67128_g1 | DHV|c28949_g1 | eua|XP_023339000.1 |
| OG08624 | ama|XP_043220643.1 | CHN|c119494_g1 | DHV|c29574_g1 | eua|XP_023330942.1 |
| OG08626 | ama|XP_043223557.1 | CHN|c95914_g2 | DHV|c23486_g1 | eua|XP_023324562.1 |
| OG08627 | ama|XP_043224536.1 | CHN|c81998_g1 | DHV|c24118_g1 | eua|XP_023343201.1 |
| OG08628 | ama|XP_043224881.1 | CHN|c94372_g1 | DHV|c16258_g1 | eua|XP_023340513.1 |
| OG08629 | ama|XP_043225488.1 | CHN|c88082_g1 | DHV|c11648_g1 | eua|XP_023332640.1 |
| OG08630 | ama|XP_043225685.1 | CHN|c80288_g2 | DHV|c23205_g1 | eua|XP_023347460.1 |
| OG08631 | ama|XP_043227168.1 | CHN|c92540_g1 | DHV|c33455_g3 | eua|XP_023327334.1 |
| OG08632 | ama|XP_043227189.1 | CHN|c96990_g3 | DHV|c27105_g1 | eua|XP_023335089.1 |
| OG08633 | ama|XP_043227354.1 | CHN|c89032_g4 | DHV|c24665_g3 | eua|XP_023341653.1 |
| OG08634 | ama|XP_043227560.1 | CHN|c93315_g1 | DHV|c23537_g1 | eua|XP_023345414.1 |
| OG08635 | ama|XP_043227593.1 | CHN|c76298_g1 | DHV|c2070_g1 | eua|XP_023339934.1 |
| OG08636 | ama|XP_043227959.1 | CHN|c70285_g1 | DHV|c32602_g1 | eua|XP_023328294.1 |
| OG08637 | ama|XP_043228111.1 | CHN|c81705_g2 | DHV|c7868_g1 | eua|XP_023331355.1 |
| OG08638 | ama|XP_043228162.1 | CHN|c68200_g3 | DHV|c28229_g1 | eua|XP_023344760.1 |
| OG08640 | ama|XP_043228531.1 | CHN|c14768_g1 | DHV|c34548_g1 | eua|XP_023332475.1 |
| OG08641 | ama|XP_043228640.1 | CHN|c123_g1 | DHV|c24290_g1 | eua|XP_023339557.1 |
| OG08642 | ama|XP_043228644.1 | CHN|c94901_g1 | DHV|c5291_g1 | eua|XP_023341514.1 |
| OG08643 | ama|XP_043228378.1 | CHN|c76220_g2 | DHV|c34558_g3 | eua|XP_023339194.1 |
| OG08644 | ama|XP_043228852.1 | CHN|c95602_g3 | DHV|c34015_g3 | eua|XP_023331012.1 |
| OG08645 | ama|XP_043229645.1 | CHN|c63622_g1 | DHV|c26985_g1 | eua|XP_023327670.1 |
| OG08646 | ama|XP_043229677.1 | CHN|c64778_g1 | DHV|c32539_g1 | eua|XP_023326852.1 |
| OG08647 | ama|XP_043230737.1 | CHN|c92232_g3 | DHV|c17732_g1 | eua|XP_023336611.1 |
| OG08648 | ama|XP_043231253.1 | CHN|c10998_g1 | DHV|c27658_g1 | eua|XP_023329643.1 |
| OG08649 | ama|XP_043231283.1 | CHN|c96263_g4 | DHV|c32712_g1 | eua|XP_023336717.1 |
| OG08650 | ama|XP_043231305.1 | CHN|c84859_g5 | DHV|c13306_g1 | eua|XP_023327845.1 |
| OG08651 | ama|XP_043231322.1 | CHN|c86480_g1 | DHV|c9177_g1 | eua|XP_023338697.1 |
| OG08653 | ama|XP_043232885.1 | CHN|c91846_g4 | DHV|c16313_g1 | eua|XP_023320890.1 |
| OG08654 | ama|XP_043233031.1 | CHN|c72566_g1 | DHV|c34080_g6 | eua|XP_023332954.1 |
| OG08655 | ama|XP_043233353.1 | CHN|c90248_g2 | DHV|c33956_g6 | eua|XP_023333160.1 |
| OG08656 | ama|XP_043233354.1 | CHN|c96268_g1 | DHV|c19200_g1 | eua|XP_023323695.1 |
| OG08659 | ama|XP_043234230.1 | CHN|c86413_g1 | DHV|c23747_g1 | eua|XP_023322728.1 |
| OG08660 | ama|XP_043234260.1 | CHN|c78108_g1 | DHV|c19666_g1 | eua|XP_023328948.1 |
| OG08661 | ama|XP_043234341.1 | CHN|c77251_g1 | DHV|c12505_g1 | eua|XP_023332528.1 |
| OG08662 | ama|XP_043234408.1 | CHN|c71647_g1 | DHV|c31272_g2 | eua|XP_023323916.1 |
| OG08663 | ama|XP_043234638.1 | CHN|c96704_g4 | DHV|c41290_g1 | eua|XP_023347671.1 |
| OG08664 | ama|XP_043234801.1 | CHN|c65822_g1 | DHV|c34893_g1 | eua|XP_023320964.1 |
| OG08665 | ama|XP_043234824.1 | CHN|c91607_g1 | DHV|c22420_g1 | eua|XP_023325943.1 |
| OG08666 | ama|XP_043235336.1 | CHN|c102679_g1 | DHV|c21973_g1 | eua|XP_023346196.1 |
| OG08667 | ama|XP_043235741.1 | CHN|c96126_g5 | DHV|c19788_g1 | eua|XP_023333116.1 |
| OG08668 | ama|XP_043236110.1 | CHN|c73067_g1 | DHV|c27809_g2 | eua|XP_023319969.1 |
| OG08670 | ama|XP_043237829.1 | CHN|c83784_g2 | DHV|c31471_g1 | eua|XP_023346035.1 |
| OG08671 | ama|XP_043237975.1 | CHN|c8532_g1 | DHV|c32984_g1 | eua|XP_023335079.1 |
| OG08672 | ama|XP_043237976.1 | CHN|c95310_g2 | DHV|c31823_g2 | eua|XP_023326459.1 |
| OG08673 | ama|XP_043238115.1 | CHN|c91769_g3 | DHV|c29238_g1 | eua|XP_023324353.1 |
| OG08674 | ama|XP_043238306.1 | CHN|c31171_g1 | DHV|c34014_g1 | eua|XP_023329469.1 |
| OG08675 | ama|XP_043238601.1 | CHN|c84869_g2 | DHV|c24715_g2 | eua|XP_023330985.1 |
| OG08676 | ama|XP_043238607.1 | CHN|c93934_g1 | DHV|c25179_g1 | eua|XP_023338480.1 |
| OG08677 | ama|XP_043238916.1 | CHN|c95374_g2 | DHV|c33955_g2 | eua|XP_023339731.1 |
| OG08678 | ama|XP_043239466.1 | CHN|c78759_g1 | DHV|c35445_g1 | eua|XP_023331591.1 |
| OG08679 | ama|XP_043239691.1 | CHN|c119647_g1 | DHV|c17490_g1 | eua|XP_023337262.1 |
| OG08680 | ama|XP_043239692.1 | CHN|c58258_g1 | DHV|c7594_g1 | eua|XP_023319686.1 |
| OG08682 | ama|XP_043240214.1 | CHN|c119345_g1 | DHV|c15124_g1 | eua|XP_023346572.1 |
| OG08683 | ama|XP_043240565.1 | CHN|c121709_g1 | DHV|c26026_g1 | eua|XP_023323420.1 |
| OG08684 | ama|XP_043240620.1 | CHN|c79497_g1 | DHV|c24640_g1 | eua|XP_023345985.1 |
| OG08685 | ama|XP_043241065.1 | CHN|c81104_g1 | DHV|c11726_g1 | eua|XP_023322960.1 |
| OG08686 | ama|XP_043241107.1 | CHN|c91274_g3 | DHV|c9400_g1 | eua|XP_023335167.1 |
| OG08687 | ama|XP_043242346.1 | CHN|c89565_g1 | DHV|c32565_g1 | eua|XP_023344606.1 |
| OG08688 | ama|XP_043243226.1 | CHN|c92562_g1 | DHV|c17175_g1 | eua|XP_023328211.1 |
| OG08689 | ama|XP_043243423.1 | CHN|c96832_g1 | DHV|c11610_g1 | eua|XP_023319908.1 |
| OG08690 | ama|XP_043243680.1 | CHN|c74547_g1 | DHV|c4579_g1 | eua|XP_023324610.1 |
| OG08691 | ama|XP_043243718.1 | CHN|c36218_g1 | DHV|c30752_g2 | eua|XP_023341828.1 |
| OG08692 | ama|XP_043245158.1 | CHN|c88670_g1 | DHV|c34255_g2 | eua|XP_023336459.1 |
| OG08693 | ama|XP_043245219.1 | CHN|c78780_g3 | DHV|c14854_g1 | eua|XP_023348863.1 |
| OG08694 | ama|XP_043245409.1 | CHN|c90125_g1 | DHV|c11620_g1 | eua|XP_023334078.1 |
| OG08695 | ama|XP_043245434.1 | CHN|c53982_g1 | DHV|c16830_g1 | eua|XP_023328313.1 |
| OG08696 | ama|XP_043245473.1 | CHN|c84864_g1 | DHV|c29374_g1 | eua|XP_023329077.1 |
| OG08697 | ama|XP_043245616.1 | CHN|c87357_g1 | DHV|c29863_g1 | eua|XP_023341838.1 |
| OG08698 | ama|XP_043246336.1 | CHN|c92114_g1 | DHV|c30429_g1 | eua|XP_023321483.1 |
| OG08699 | ama|XP_043246392.1 | CHN|c114317_g1 | DHV|c16329_g1 | eua|XP_023323994.1 |
| OG08701 | ama|XP_043247368.1 | CHN|c94825_g1 | DHV|c32517_g1 | eua|XP_023349661.1 |
