# Supplementary material for: Comparative omics analysis of a deep-sea barnacle species (Cirripedia, Scalpellomorpha) and shallow-water barnacle species provides insights into deep-sea adaptation
Source: Frontiers journal article supplement (doi:10.3389/fmars.2023.1269411), 2024-01-12
Supplement: Table_4.DOCX [file Table_4.DOCX]

**Table S4** Statistical physical and chemical properties of the positively selected genes in *Vulcanolepas fijiensis* and *Scalpellum stearnsi*

| Gene | Nucleotide length（bp） | Integrity of ORF（Yes/No） | Amino acid domain positions | signal peptide（Yes/No） | molecular weight（KDa） | Isoelectric point |
| --- | --- | --- | --- | --- | --- | --- |
| *C3ORF10* | 541 | Yes |  | No | 20.69 | 9.07 |
| *ELF* | 721 | Yes | 147-234 | No | 27.23 | 9.88 |
| *ATG12* | 361 | Yes | 46-128 | No | 14.23 | 6.05 |
| *UPRT* | 601 | Yes | 15-156 | No | 23.16 | 9.08 |
| *RPS21* | 241 | Yes | 1-80 | No | 9.21 | 7.69 |
